# Supplementary material for: One-step preparation of Co2V2O7: synthesis and application as a Fenton-like catalyst in a gas diffusion electrode
Source: Royal Society of Chemistry journal article supplement (doi:10.1039/d2cp00072e), 2022-01-01
Supplement: d2cp00072e1.pdf [file d2cp00072e1.pdf]

# One-step preparation of $\text{Co}_2\text{V}_2\text{O}_7$ : synthesis and application as Fenton-like catalyst in gas diffusion electrode

*Murilo Fernando Gromboni<sup>a</sup>, Paulo Jorge Marques Cordeiro-Junior<sup>a</sup>, Patricia Gon Corradini<sup>b,c</sup>, Lucia Helena Mascaró<sup>b</sup>, Marcos Roberto de Vasconcelos Lanza<sup>a</sup>*

<sup>a</sup>*São Carlos Institute of Chemistry, University of São Paulo, São Carlos, SP, 13566-590, Brazil*

<sup>b</sup>*Department of Chemistry, Federal University of São Carlos, São Carlos, SP, 13565-905, Brazil*

<sup>c</sup>*Fluminense Federal Institute of Education, Science and Technology, Campus Itaperuna, Itaperuna, RJ, 28300-000, Brazil*

## **SUPPLEMENTARY MATERIAL**

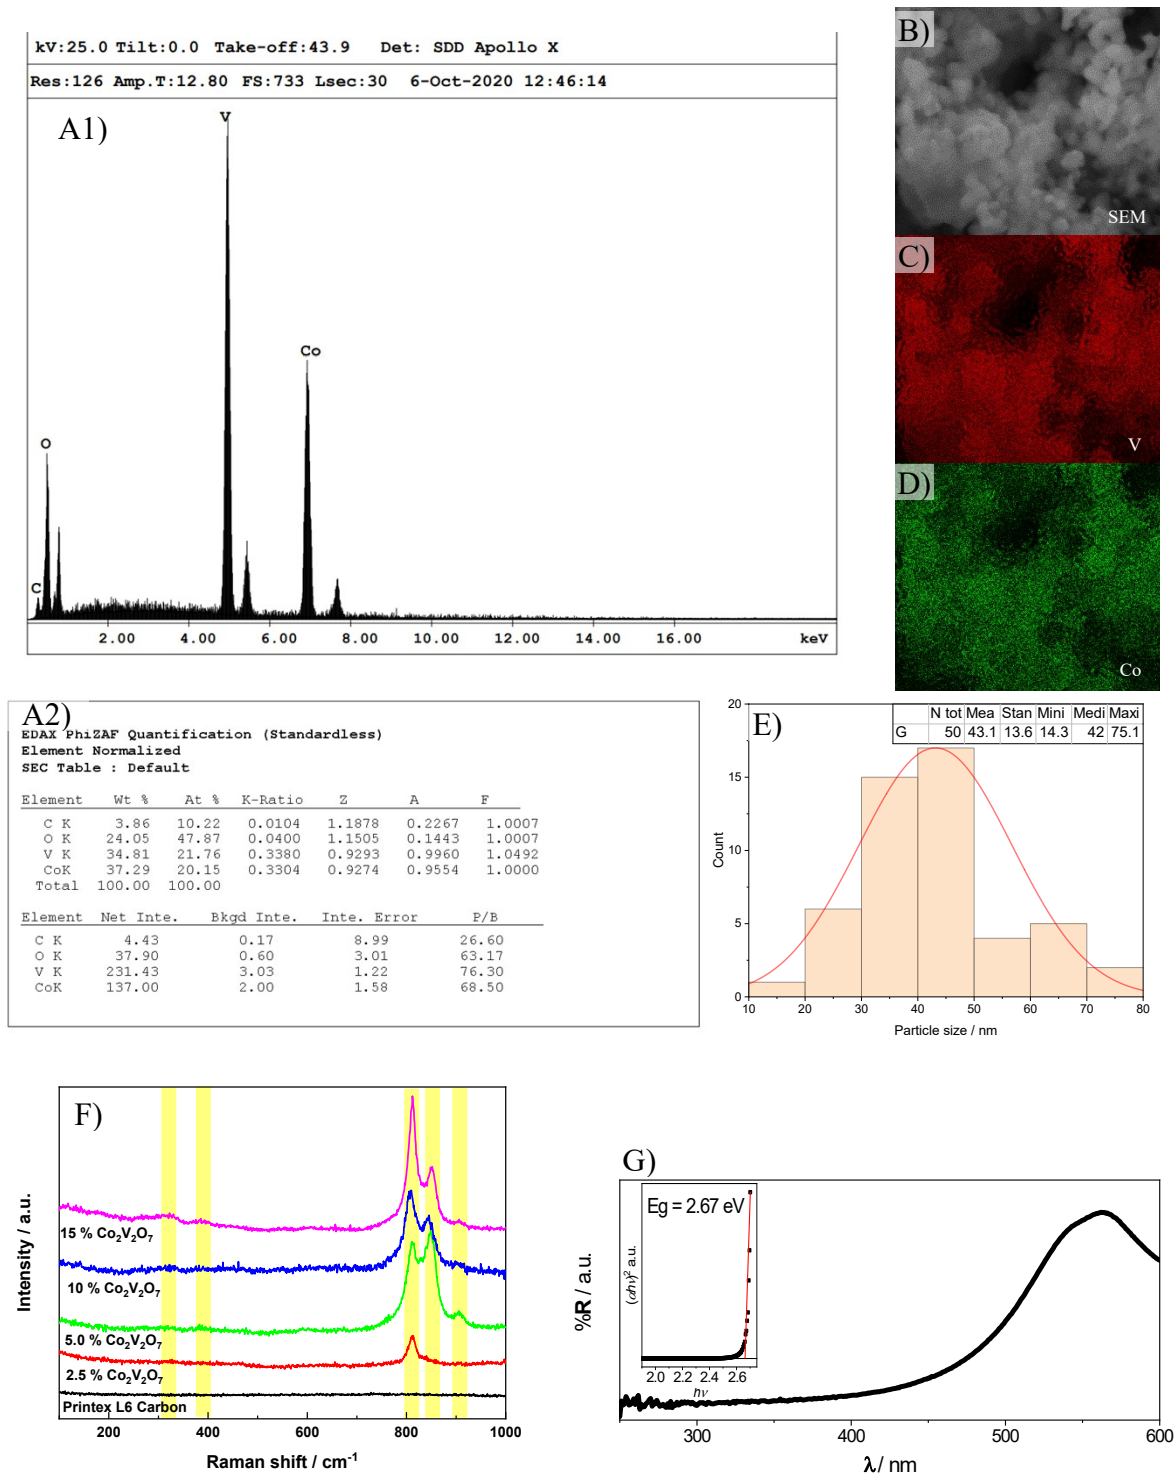

**Figure S1.** A1) Energy dispersive X-ray (EDS) spectra of as-synthesized sample and A2) the table with quantification results. B) SEM images from  $\text{Co}_2\text{V}_2\text{O}_7$  layer over silicon and SEM EDX elemental maps of C) Vanadium and D) Cobalt. E) A particle size distribution histogram determined from the SEM images. F) Raman spectra of PL6C and mixture with different composition of  $\text{Co}_2\text{V}_2\text{O}_7$ . G) UV-VIS diffuse reflectance spectroscopy (DRS) spectra for as-synthesized sample and the insets show the plots of  $(\alpha h\nu)^2$  versus bandgap of  $\text{Co}_2\text{V}_2\text{O}_7$ .

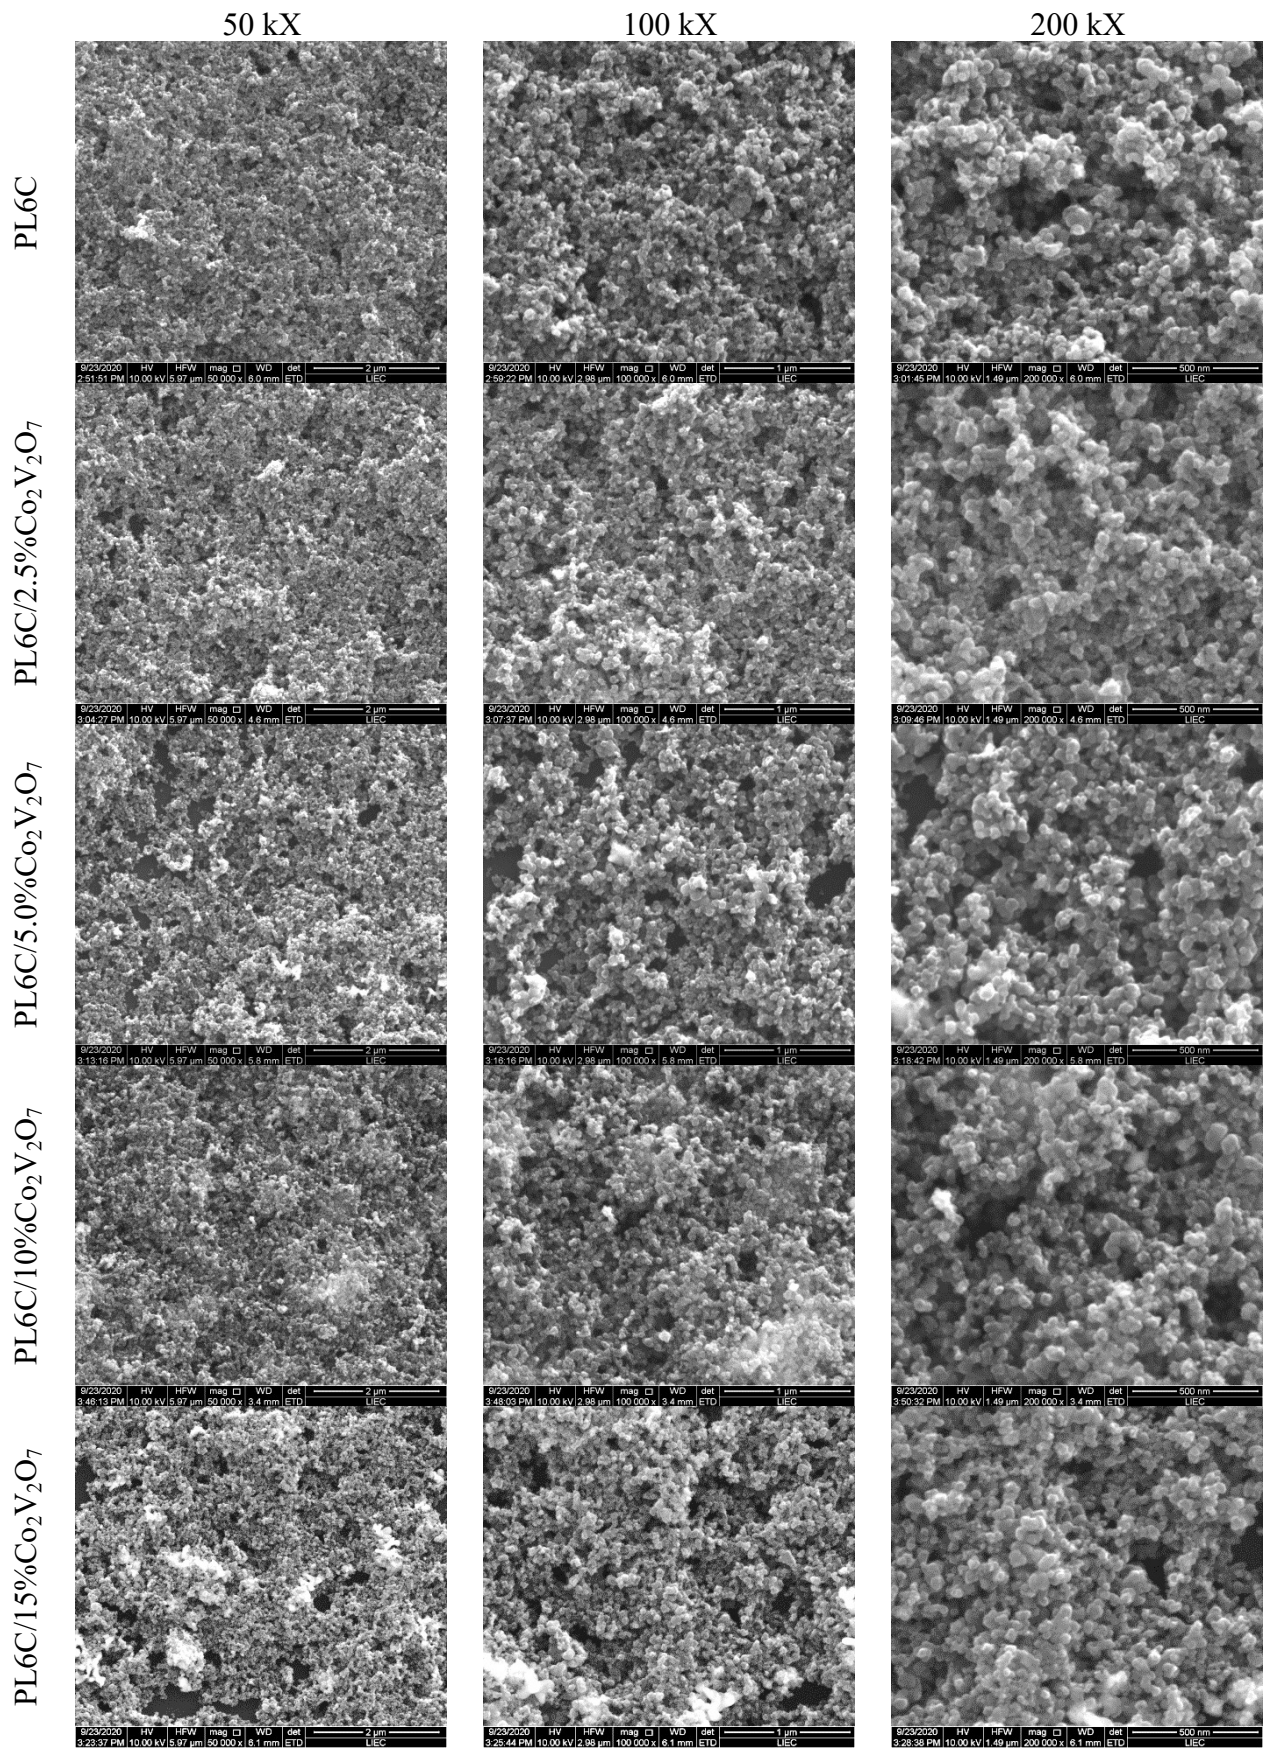

Figure S2. SEM images of PL6C and Co<sub>2</sub>V<sub>2</sub>O<sub>7</sub>/PL6C with different ratio and magnification.

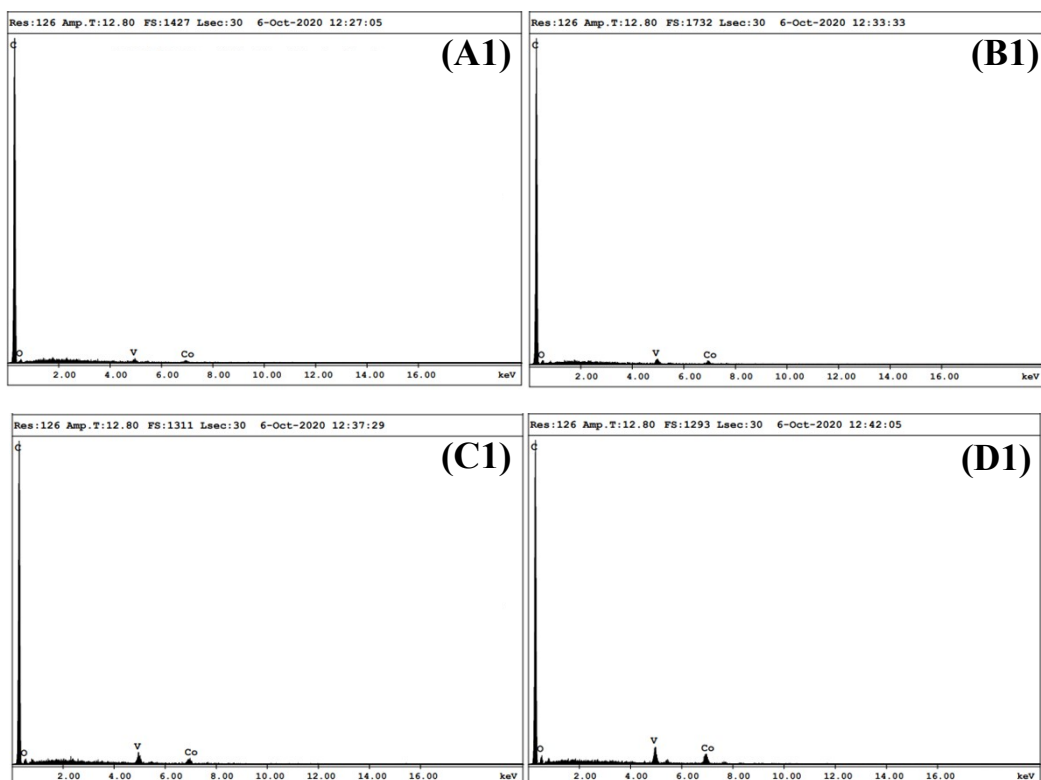

**EDAX PhiZAF Quantification (Standardless)**  
**Element Normalized**  
**SEC Table : Default** **(A2)**

| Element | Wt %   | At %   | K-Ratio | Z      | A      | F      |
|---------|--------|--------|---------|--------|--------|--------|
| C K     | 92.88  | 96.12  | 0.7895  | 1.0069 | 0.8442 | 1.0000 |
| O K     | 5.42   | 3.21   | 0.0038  | 0.9765 | 0.0930 | 1.0000 |
| V K     | 0.79   | 0.33   | 0.0112  | 0.7842 | 1.0455 | 1.0143 |
| CoK     | 0.91   | 0.35   | 0.0131  | 0.7780 | 1.0296 | 1.0000 |
| Total   | 100.00 | 100.00 |         |        |        |        |

  

| Element | Net Inte. | Bkgd Inte. | Inte. Error | P/B     |
|---------|-----------|------------|-------------|---------|
| C K     | 205.53    | 0.17       | 1.27        | 1233.20 |
| O K     | 2.17      | 0.40       | 14.51       | 5.42    |
| V K     | 4.67      | 0.70       | 9.64        | 6.67    |
| CoK     | 3.30      | 0.50       | 11.47       | 6.60    |

**EDAX PhiZAF Quantification (Standardless)**  
**Element Normalized**  
**SEC Table : Default** **(B2)**

| Element | Wt %   | At %   | K-Ratio | Z      | A      | F      |
|---------|--------|--------|---------|--------|--------|--------|
| C K     | 90.64  | 95.20  | 0.7284  | 1.0101 | 0.7955 | 1.0001 |
| O K     | 6.25   | 3.74   | 0.0044  | 0.9796 | 0.0946 | 1.0001 |
| V K     | 1.46   | 0.53   | 0.0181  | 0.7869 | 1.0445 | 1.0184 |
| CoK     | 1.65   | 0.53   | 0.0197  | 0.7807 | 1.0278 | 1.0000 |
| Total   | 100.00 | 100.00 |         |        |        |        |

  

| Element | Net Inte. | Bkgd Inte. | Inte. Error | P/B    |
|---------|-----------|------------|-------------|--------|
| C K     | 233.53    | 0.33       | 1.20        | 700.60 |
| O K     | 3.13      | 0.80       | 12.68       | 3.92   |
| V K     | 9.30      | 0.87       | 6.52        | 10.73  |
| CoK     | 6.13      | 0.50       | 7.95        | 12.27  |

**EDAX PhiZAF Quantification (Standardless)**  
**Element Normalized**  
**SEC Table : Default** **(C2)**

| Element | Wt %   | At %   | K-Ratio | Z      | A      | F      |
|---------|--------|--------|---------|--------|--------|--------|
| C K     | 87.90  | 94.13  | 0.6640  | 1.0146 | 0.7445 | 1.0001 |
| O K     | 5.31   | 4.27   | 0.0050  | 0.9839 | 0.0964 | 1.0001 |
| V K     | 3.49   | 0.88   | 0.0293  | 0.7905 | 1.0429 | 1.0206 |
| CoK     | 3.31   | 0.72   | 0.0266  | 0.7844 | 1.0246 | 1.0000 |
| Total   | 100.00 | 100.00 |         |        |        |        |

  

| Element | Net Inte. | Bkgd Inte. | Inte. Error | P/B     |
|---------|-----------|------------|-------------|---------|
| C K     | 188.03    | 0.17       | 1.33        | 1128.20 |
| O K     | 3.17      | 0.20       | 10.89       | 15.83   |
| V K     | 13.30     | 0.43       | 5.17        | 30.69   |
| CoK     | 7.30      | 0.50       | 7.21        | 14.60   |

**EDAX PhiZAF Quantification (Standardless)**  
**Element Normalized**  
**SEC Table : Default** **(D2)**

| Element | Wt %   | At %   | K-Ratio | Z      | A      | F      |
|---------|--------|--------|---------|--------|--------|--------|
| C K     | 82.97  | 92.04  | 0.5554  | 1.0222 | 0.6548 | 1.0001 |
| O K     | 6.51   | 5.42   | 0.0066  | 0.9913 | 0.1019 | 1.0002 |
| V K     | 4.55   | 1.19   | 0.0389  | 0.7968 | 1.0397 | 1.0310 |
| CoK     | 5.97   | 1.35   | 0.0482  | 0.7909 | 1.0215 | 1.0000 |
| Total   | 100.00 | 100.00 |         |        |        |        |

  

| Element | Net Inte. | Bkgd Inte. | Inte. Error | P/B     |
|---------|-----------|------------|-------------|---------|
| C K     | 181.30    | 0.17       | 1.36        | 1087.80 |
| O K     | 4.77      | 0.20       | 8.71        | 23.83   |
| V K     | 20.30     | 1.27       | 4.30        | 16.03   |
| CoK     | 15.27     | 0.50       | 4.82        | 30.53   |

E) Theoretical values of expected mass

|                                               | 2.5%       | 5%         | 10%        | 15%        |
|-----------------------------------------------|------------|------------|------------|------------|
| Carbon                                        | 97.5       | 95.0       | 90.0       | 85.0       |
| Co <sub>2</sub> V <sub>2</sub> O <sub>7</sub> | 2.5        | 5.0        | 10.0       | 15.0       |
| <b>Co</b>                                     | <b>0.9</b> | <b>1.8</b> | <b>3.6</b> | <b>5.3</b> |
| <b>V</b>                                      | <b>0.8</b> | <b>1.5</b> | <b>3.1</b> | <b>4.6</b> |

F) EDS values

|                                               | 2.5%        | 5%          | 10%         | 15%         |
|-----------------------------------------------|-------------|-------------|-------------|-------------|
| <b>Co</b>                                     | <b>0.91</b> | <b>1.65</b> | <b>3.31</b> | <b>5.97</b> |
| <b>V</b>                                      | <b>0.79</b> | <b>1.46</b> | <b>3.49</b> | <b>4.55</b> |
| Co <sub>2</sub> V <sub>2</sub> O <sub>7</sub> | 2.6         | 4.7         | 10.3        | 15.8        |

**Figure S3.** Energy dispersive X-ray (EDS) spectra of composites PL6C/Co<sub>2</sub>V<sub>2</sub>O<sub>7</sub> at 2.5% (A1); 5% (B1); 10% (C1); and 15% (D1) (A2-D2) the table with quantification. Information of the theoretical values of expected mass (E) and the EDS values obtained (F).

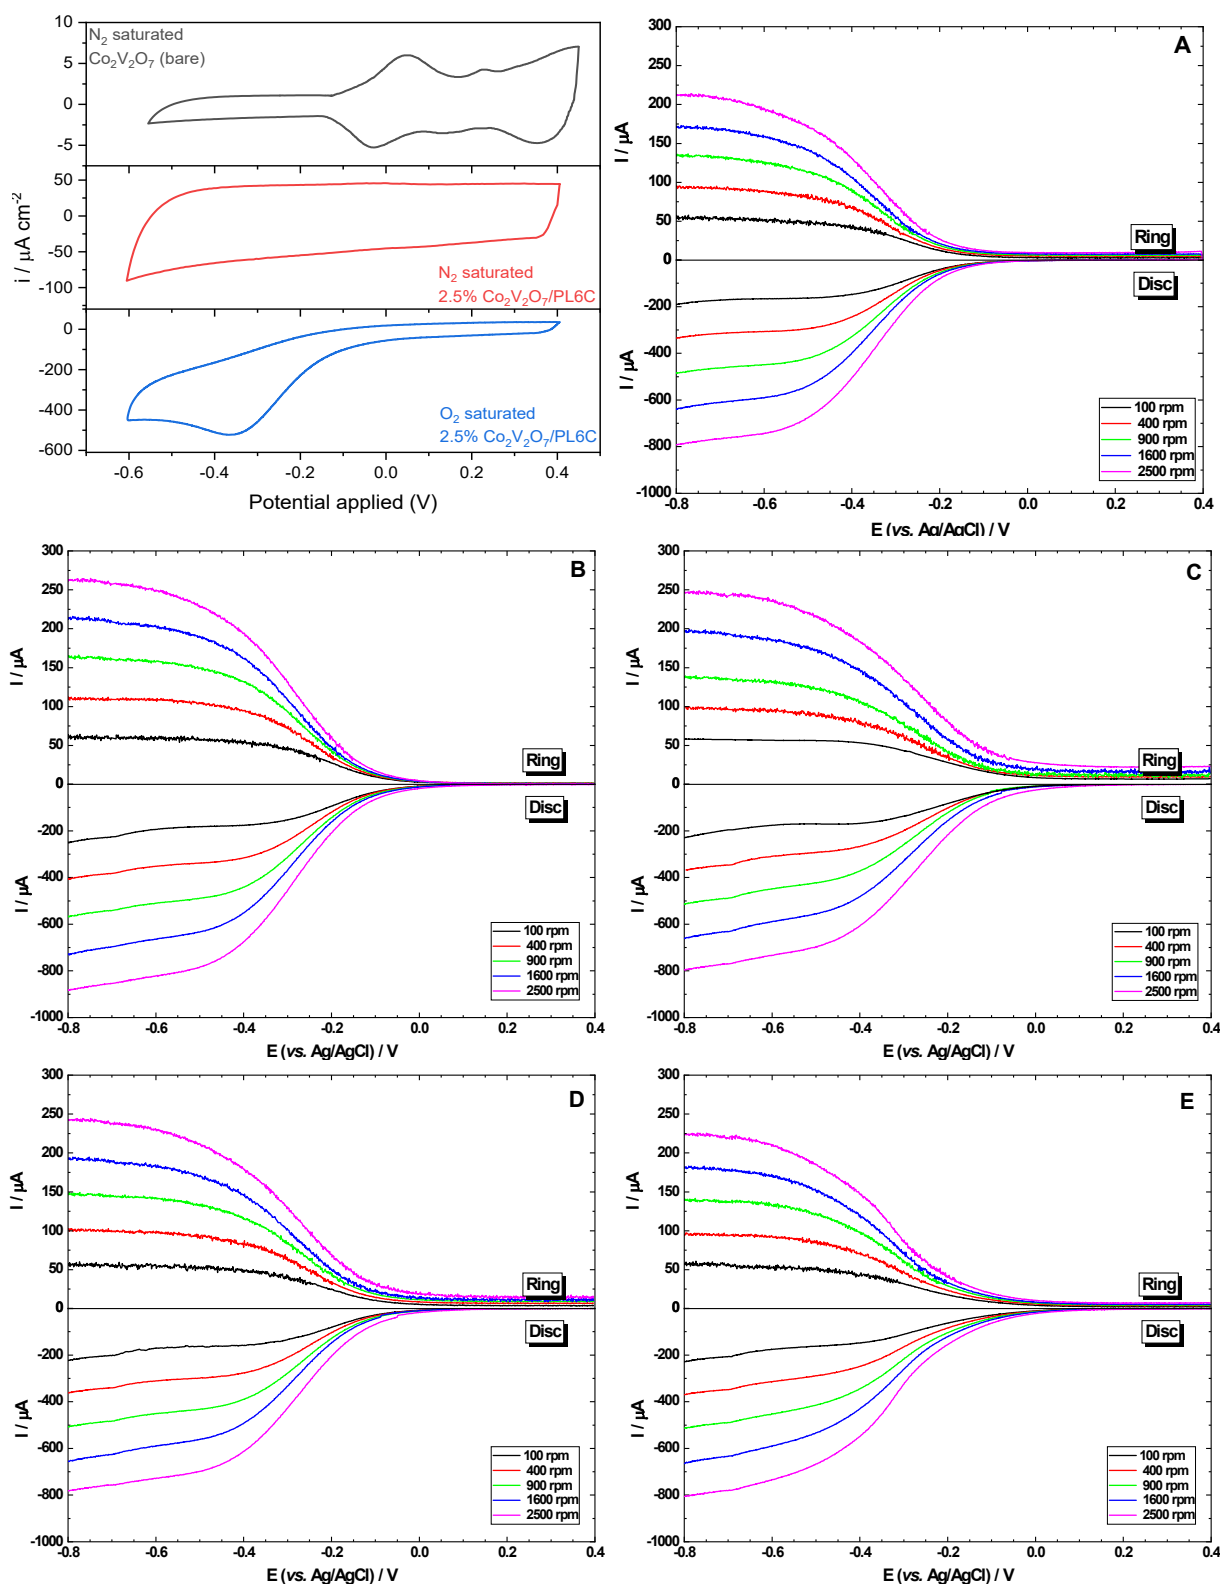

**Figure S4.** Linear sweep voltammograms for the PL6C (A) and the  $\text{Co}_2\text{V}_2\text{O}_7/\text{PL6C}$  in the proportions of: 2.5% (B), 5.0% (C), 10% (D) and 15% (E) (w/w) at 100, 400, 900, 1600 and 2500 rpm and scan rate  $5 \text{ mV s}^{-1}$ . Electrolyte support was  $\text{K}_2\text{SO}_4$   $0.1 \text{ mol L}^{-1}$  pH 2.5 saturated with  $\text{O}_2$ .

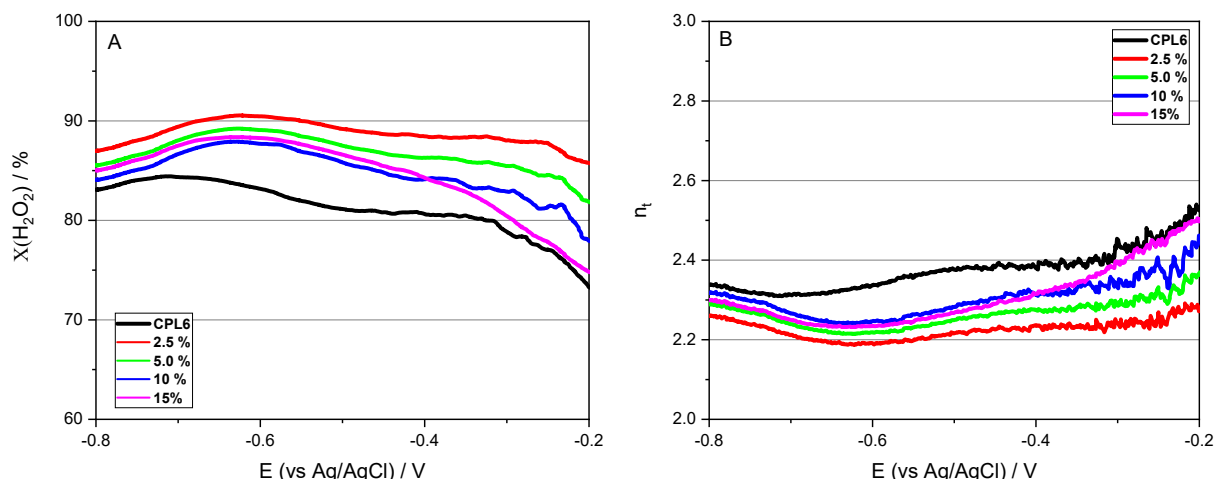

**Figure S5.** Current efficiency for H<sub>2</sub>O<sub>2</sub> electrogeneration (A) and number of electrons involved in the ORR (B) for the Co<sub>2</sub>V<sub>2</sub>O<sub>7</sub>/PL6C in the proportions of 2.5, 5.0, 10, 15% (w/w), and only PL6C at 900 rpm. Electrolyte support was K<sub>2</sub>SO<sub>4</sub> 0.1 mol L<sup>-1</sup> pH 2.5 saturated with O<sub>2</sub>.

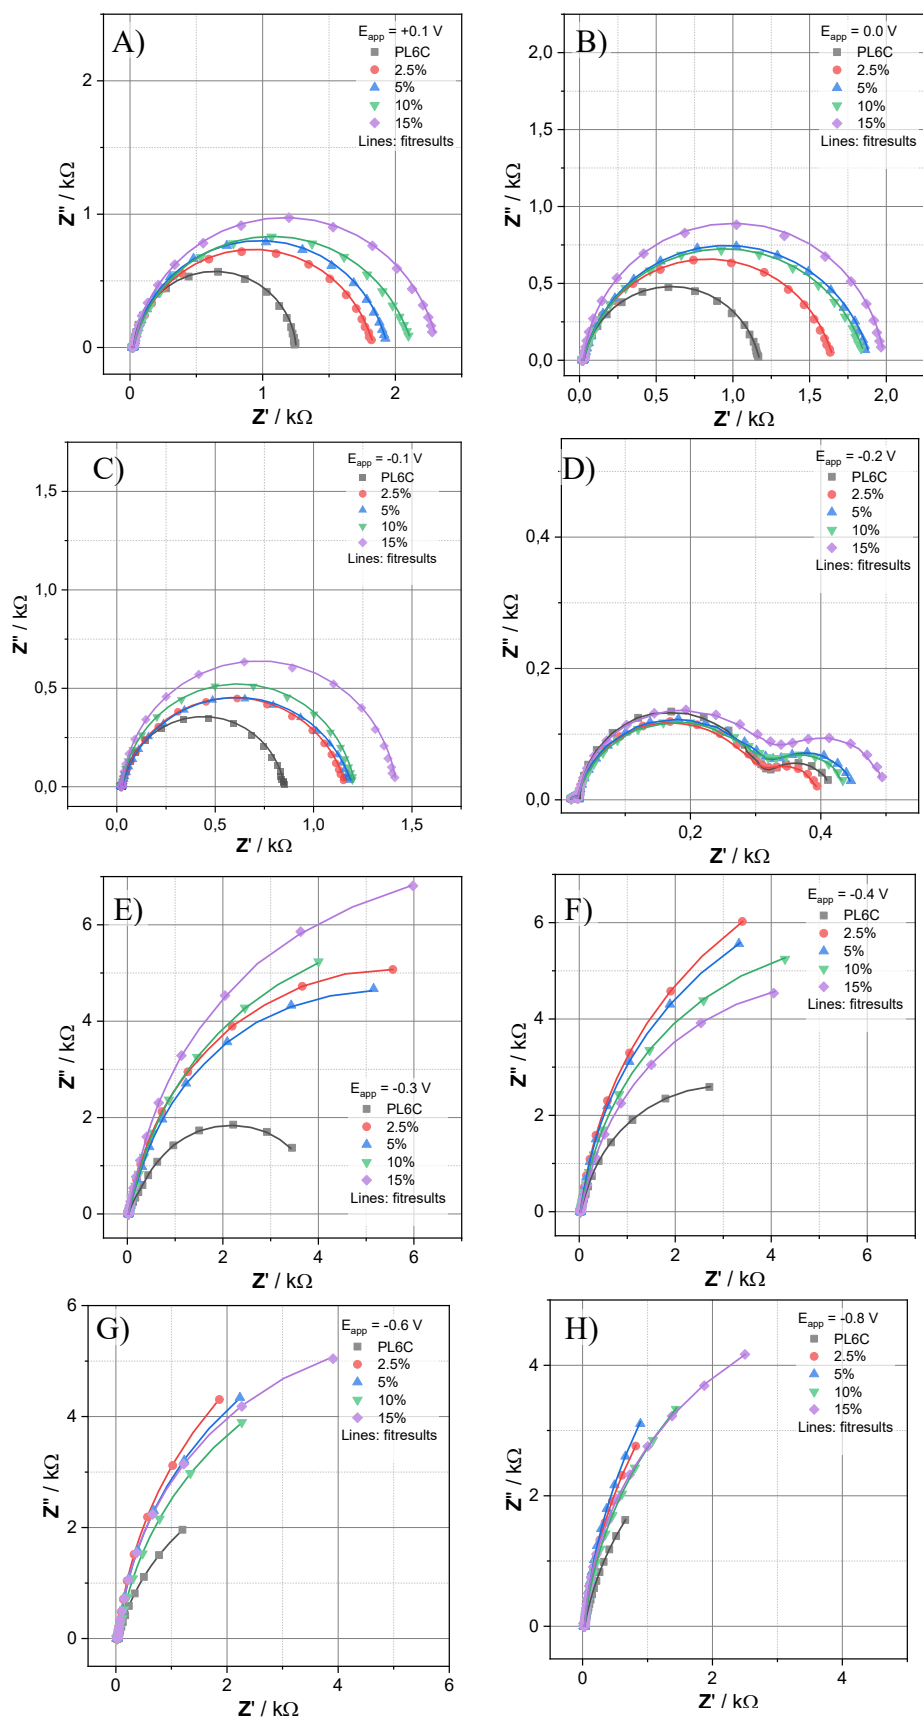

**Figure S6:** Nyquist plots to PL6C and 2.5-15%  $\text{Co}_2\text{V}_2\text{O}_7/\text{PL6C}$  at different potentials: A) +0.1; B) 0; C) -0.1; D) -0.2; E) -0.3; F) -0.4; G) -0.6 and H) -0.8 V. Electrolyte support was  $\text{K}_2\text{SO}_4$  0.1 mol  $\text{L}^{-1}$  pH 2.5 saturated with  $\text{O}_2$ , and the electrode was spun at 900 rpm.

**Table S1:** Data fitting EIS

|             | Eapl <sup>a</sup> | Rsol <sup>b</sup> | Ctrap <sup>c</sup> | Qtrap <sup>d</sup> | n <sup>e</sup> | Rtrns <sup>f</sup> | Cdl <sup>g</sup> | Qdl <sup>h</sup> | n <sup>i</sup> | Rct <sup>j</sup> | Z-R <sup>k</sup> | Z-T <sup>l</sup> | Z-P <sup>m</sup> |
|-------------|-------------------|-------------------|--------------------|--------------------|----------------|--------------------|------------------|------------------|----------------|------------------|------------------|------------------|------------------|
| <b>PL6C</b> | 0.1               | 16.7              | 1.8E-06            | 3.4E-06            | 0.892          | 12.1               | 1.9E-04          | 1.7E-04          | 0.959          | 1219             | 4                | 19.9             | 0.5              |
|             | 0                 | 16.4              | 1.8E-06            | 4.8E-06            | 0.840          | 12.5               | 1.9E-04          | 1.5E-04          | 0.891          | 1141             | 5                | 19.2             | 0.5              |
|             | -0.1              | 16.1              | 1.1E-06            | 2.9E-06            | 0.857          | 11.6               | 1.8E-04          | 1.8E-04          | 0.910          | 822              | 6                | 14.9             | 0.5              |
|             | -0.2              | 18.0              | 1.5E-06            | 3.2E-06            | 0.904          | 12.8               | 2.2E-04          | 2.2E-04          | 0.981          | 270              | 119              | 10.1             | 0.5              |
|             | -0.3              | 16.7              | 2.3E-06            | 3.2E-06            | 0.965          | 13.5               | 4.7E-04          | 5.8E-04          | 0.950          | 56               | 4013             | 8.4              | 0.5              |
|             | -0.4              | 17.2              | 3.3E-06            | 5.9E-06            | 0.933          | 14.9               | 1.2E-03          | 1.6E-03          | 0.906          | 49               | 5887             | 7.6              | 0.5              |
|             | -0.6              | 17.7              | 4.3E-06            | 1.1E-05            | 0.888          | 16.3               | 2.0E-03          | 3.2E-03          | 0.835          | 69               | 7699             | 5.3              | 0.5              |
|             | -0.8              | 16.0              | 5.0E-06            | 9.1E-06            | 0.920          | 15.9               | 4.5E-03          | 5.3E-03          | 0.887          | 99               | 8943             | 1.2              | 0.5              |
| <b>25 %</b> | 0.1               | 15.8              | 1.7E-06            | 7.7E-06            | 0.862          | 11.0               | 2.3E-04          | 1.5E-04          | 0.872          | 1801             | 13               | 22.9             | 0.5              |
|             | 0                 | 15.7              | 1.7E-06            | 9.9E-06            | 0.839          | 11.1               | 2.3E-04          | 1.7E-04          | 0.869          | 1622             | 8                | 18.8             | 0.5              |
|             | -0.1              | 15.6              | 1.1E-06            | 9.2E-06            | 0.811          | 10.8               | 2.3E-04          | 2.1E-04          | 0.859          | 1133             | 9                | 15.9             | 0.5              |
|             | -0.2              | 15.7              | 1.5E-06            | 8.9E-06            | 0.837          | 11.5               | 2.5E-04          | 2.8E-04          | 0.886          | 278              | 94               | 7.5              | 0.5              |
|             | -0.3              | 15.8              | 2.2E-06            | 5.4E-06            | 0.915          | 12.2               | 6.1E-04          | 8.4E-04          | 0.929          | 36               | 11215            | 6.0              | 0.5              |
|             | -0.4              | 15.6              | 3.1E-06            | 1.3E-05            | 0.859          | 13.6               | 1.0E-03          | 1.3E-03          | 0.941          | 16               | 16800            | 7.4              | 0.5              |
|             | -0.6              | 15.8              | 4.1E-06            | 8.8E-06            | 0.920          | 15.1               | 1.7E-03          | 2.1E-03          | 0.943          | 22               | 15081            | 6.7              | 0.5              |
|             | -0.8              | 15.9              | 4.4E-06            | 1.3E-05            | 0.889          | 14.8               | 3.3E-03          | 3.8E-03          | 0.944          | 35               | 15186            | 1.1              | 0.5              |



|     | Eapl <sup>a</sup> | Rsol <sup>b</sup> | Ctrap <sup>c</sup> | Qtrap <sup>d</sup> | n <sup>e</sup> | Rtrns <sup>f</sup> | Cdl <sup>g</sup> | Qdl <sup>h</sup> | n <sup>i</sup> | Rct <sup>j</sup> | Z-R <sup>k</sup> | Z-T <sup>l</sup> | Z-P <sup>m</sup> |
|-----|-------------------|-------------------|--------------------|--------------------|----------------|--------------------|------------------|------------------|----------------|------------------|------------------|------------------|------------------|
| 5%  | 0.1               | 16.6              | 1.7E-06            | 7.4E-06            | 0.862          | 10.8               | 2.4E-04          | 1.7E-04          | 0.892          | 1904             | 12               | 23.3             | 0.5              |
|     | 0                 | 16.9              | 1.7E-06            | 9.7E-06            | 0.839          | 11.0               | 2.4E-04          | 1.7E-04          | 0.860          | 1865             | 7                | 23.3             | 0.5              |
|     | -0.1              | 16.6              | 1.0E-06            | 9.0E-06            | 0.811          | 10.6               | 2.3E-04          | 2.0E-04          | 0.843          | 1165             | 7                | 16.7             | 0.5              |
|     | -0.2              | 16.6              | 1.5E-06            | 8.7E-06            | 0.837          | 11.3               | 2.5E-04          | 2.5E-04          | 0.888          | 283              | 142              | 7.2              | 0.5              |
|     | -0.3              | 16.8              | 2.2E-06            | 5.4E-06            | 0.915          | 12.1               | 5.9E-04          | 8.4E-04          | 0.917          | 41               | 10424            | 7.8              | 0.5              |
|     | -0.4              | 16.9              | 3.1E-06            | 1.3E-05            | 0.859          | 13.4               | 9.6E-04          | 1.2E-03          | 0.939          | 22               | 16800            | 7.4              | 0.5              |
|     | -0.6              | 16.8              | 4.0E-06            | 8.7E-06            | 0.920          | 14.8               | 1.6E-03          | 1.9E-03          | 0.943          | 30               | 12892            | 8.5              | 0.5              |
|     | -0.8              | 17.0              | 4.4E-06            | 1.3E-05            | 0.889          | 14.6               | 3.1E-03          | 3.4E-03          | 0.946          | 49               | 17763            | 0.9              | 0.5              |
| 10% | 0.1               | 16.3              | 1.6E-06            | 7.3E-06            | 0.862          | 10.7               | 2.8E-04          | 1.7E-04          | 0.856          | 2092             | 16               | 28.2             | 0.5              |
|     | 0                 | 16.3              | 1.6E-06            | 9.6E-06            | 0.839          | 10.9               | 3.0E-04          | 2.0E-04          | 0.852          | 1833             | 8                | 18.4             | 0.5              |
|     | -0.1              | 16.3              | 1.0E-06            | 8.8E-06            | 0.811          | 10.5               | 2.6E-04          | 2.4E-04          | 0.927          | 1177             | 10               | 16.9             | 0.5              |
|     | -0.2              | 16.3              | 1.4E-06            | 8.6E-06            | 0.837          | 11.3               | 3.0E-04          | 3.3E-04          | 0.861          | 285              | 129              | 7.8              | 0.5              |
|     | -0.3              | 16.3              | 2.1E-06            | 5.2E-06            | 0.915          | 12.0               | 7.1E-04          | 1.1E-03          | 0.898          | 46               | 13443            | 7.5              | 0.5              |
|     | -0.4              | 16.3              | 3.1E-06            | 1.3E-05            | 0.859          | 13.3               | 8.0E-04          | 1.1E-03          | 0.935          | 32               | 12193            | 7.6              | 0.5              |
|     | -0.6              | 16.3              | 3.9E-06            | 8.5E-06            | 0.920          | 14.7               | 1.3E-03          | 1.8E-03          | 0.905          | 46               | 11858            | 9.2              | 0.5              |
|     | -0.8              | 16.2              | 4.4E-06            | 1.3E-05            | 0.889          | 14.5               | 2.3E-03          | 2.8E-03          | 0.933          | 66               | 12365            | 0.8              | 0.5              |

|     | Eapl <sup>a</sup> | Rsol <sup>b</sup> | Ctrap <sup>c</sup> | Qtrap <sup>d</sup> | n <sup>e</sup> | Rtrns <sup>f</sup> | Cdl <sup>g</sup> | Qdl <sup>h</sup> | n <sup>i</sup> | Rct <sup>j</sup> | Z-R <sup>k</sup> | Z-T <sup>l</sup> | Z-P <sup>m</sup> |
|-----|-------------------|-------------------|--------------------|--------------------|----------------|--------------------|------------------|------------------|----------------|------------------|------------------|------------------|------------------|
| 15% | 0.1               | 17.0              | 1.6E-06            | 7.4E-06            | 0.862          | 10.7               | 3.0E-04          | 2.1E-04          | 0.901          | 2282             | 19               | 32.8             | 0.5              |
|     | 0                 | 17.1              | 1.6E-06            | 9.6E-06            | 0.839          | 10.8               | 2.8E-04          | 2.4E-04          | 0.946          | 1951             | 9                | 16.2             | 0.5              |
|     | -0.1              | 17.0              | 1.0E-06            | 8.9E-06            | 0.811          | 10.5               | 2.8E-04          | 2.6E-04          | 0.952          | 1387             | 8                | 13.0             | 0.5              |
|     | -0.2              | 17.1              | 1.4E-06            | 8.5E-06            | 0.837          | 11.1               | 3.1E-04          | 3.0E-04          | 0.929          | 290              | 183              | 6.5              | 0.5              |
|     | -0.3              | 16.9              | 2.0E-06            | 5.0E-06            | 0.915          | 11.8               | 6.5E-04          | 7.9E-04          | 0.953          | 53               | 14872            | 9.3              | 0.5              |
|     | -0.4              | 17.1              | 2.9E-06            | 1.2E-05            | 0.859          | 13.2               | 7.8E-04          | 1.1E-03          | 0.920          | 41               | 10534            | 8.3              | 0.5              |
|     | -0.6              | 17.1              | 3.7E-06            | 8.1E-06            | 0.920          | 14.6               | 1.2E-03          | 1.3E-03          | 0.962          | 51               | 11333            | 7.0              | 0.5              |
|     | -0.8              | 17.1              | 4.1E-06            | 1.2E-05            | 0.889          | 14.3               | 1.9E-03          | 2.1E-03          | 0.964          | 72               | 10424            | 0.9              | 0.5              |

<sup>a</sup>Eapl = Applied potential (V)

<sup>b</sup>Rsol = Resistance of solution ( $\Omega$ )

<sup>c</sup>Ctrap = capacitance generated by the trapping of electrons (F)

<sup>d</sup>Qtrap= CPE constant generated by the trapping of electrons

<sup>e</sup>n = CPE exponent of Qtrap

<sup>f</sup>Cdl= double-layer capacitance (F)

<sup>g</sup>Qdl= CPE constant generate by the double-layer

<sup>h</sup>n = CPE exponent of Qdl

<sup>i</sup>Rtrns = resistance to electron transfer ( $\Omega$ )

<sup>k</sup>Z-R = limiting diffusion resistance from Finite-Length Warburg ( $\Omega$ )

<sup>l</sup>Z-T = diffusion time constant generated by the of Finite-Length Warburg

<sup>m</sup>Z-P = exponent of diffusion time constant (to Finite-Length Warburg fixed 0.5)

**Table S2.** Tables with the values of the slopes calculated for the potential range from -0.5 to -0.1 V for  $R_{ct}$  and  $R_{diff}$ . Values for the number of electrons calculated by the method of Tan et al. compared to the values obtained by Eq. 6.

|                                           | PL6C  | 2.5%  | 5%    | 10%   | 15%   |
|-------------------------------------------|-------|-------|-------|-------|-------|
| Slope $R_{diff}$                          | -14.0 | -15.5 | -15.8 | -15.6 | -16.3 |
| Slope $R_{ct}$                            | 5.8   | 7.5   | 7.2   | 7.0   | 7.1   |
| Number $e^-$<br>by slopes                 | 2.4   | 2.1   | 2.2   | 2.2   | 2.3   |
| <i>Number <math>e^-</math><br/>by LSV</i> | 2.4   | 2.2   | 2.3   | 2.3   | 2.3   |

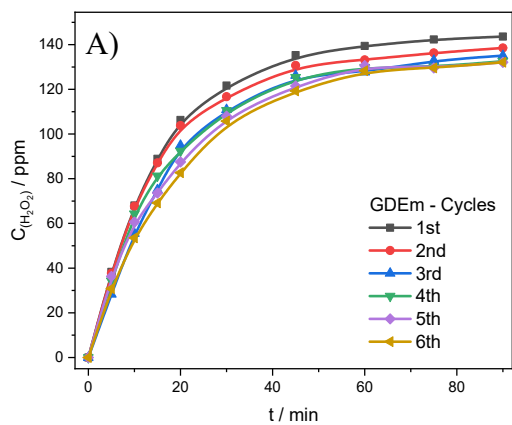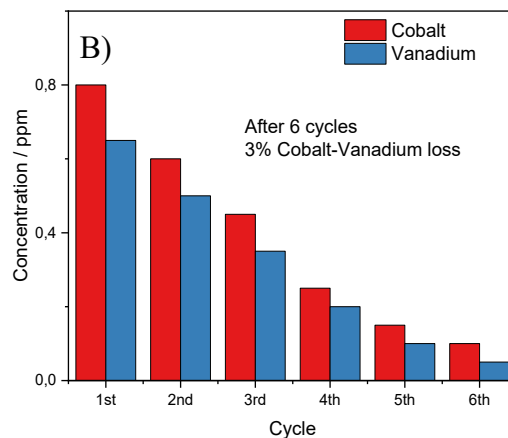

Figure S7: A) Hydrogen peroxide concentration produced as a function of time for GDEm for 90 min of electrolysis at  $75 \text{ mA cm}^{-2}$  B) Metal leaching test of the Co an V analyzed by an atomic absorption spectrometer

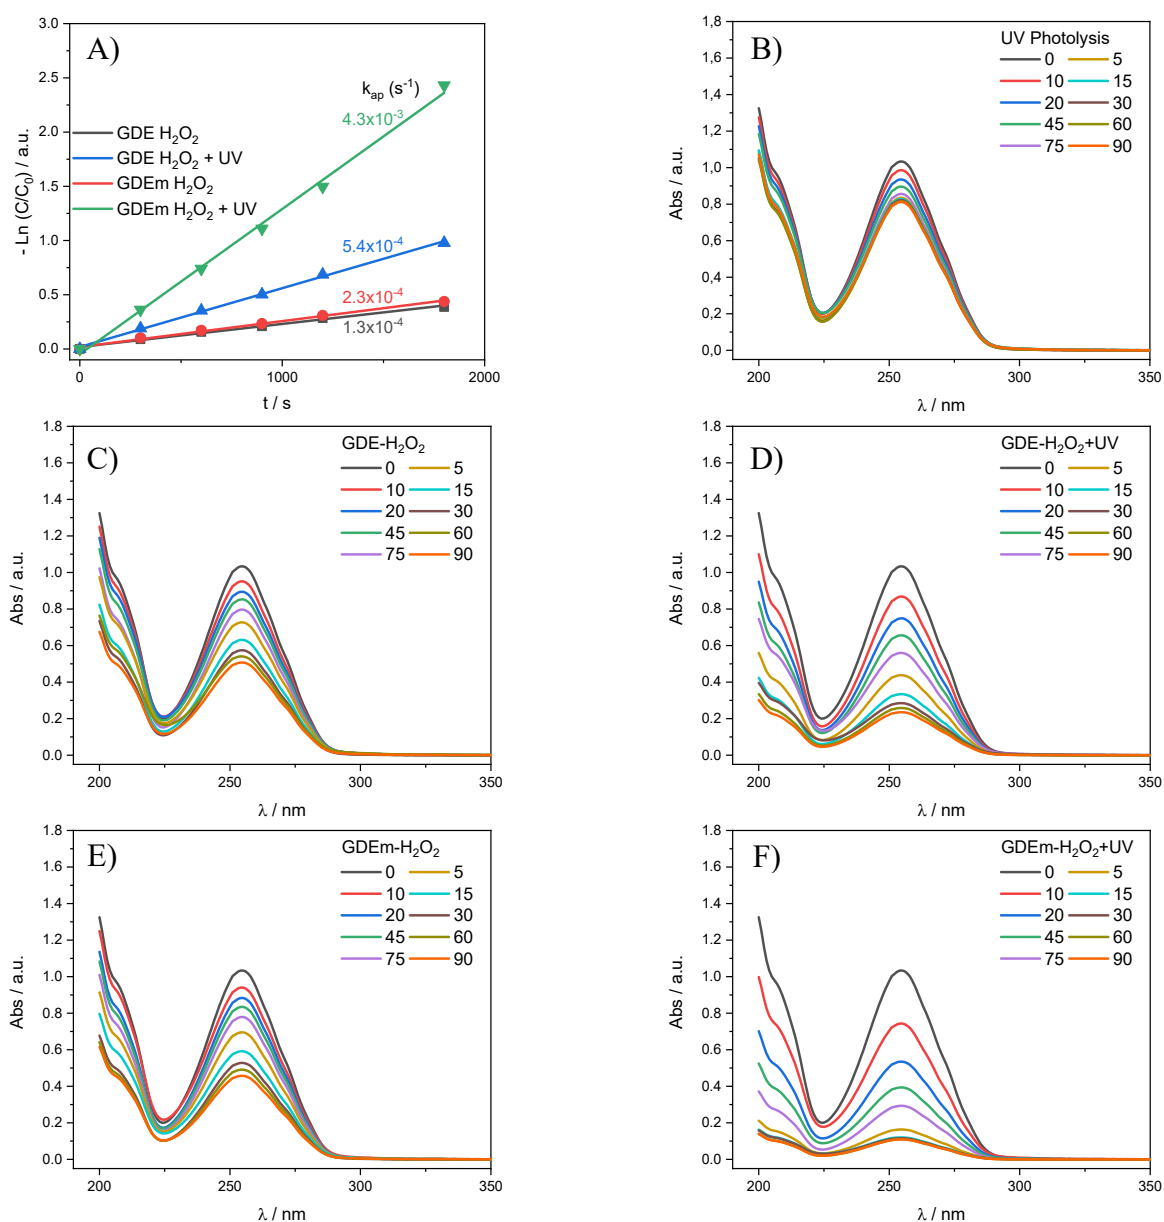

Figure S8: A) Apparent kinetic constants ( $K_{ap}$ ) for GDE and GDEm to  $e\text{-H}_2\text{O}_2$  and  $e\text{-H}_2\text{O}_2$  process and UV-Vis absorption spectra of MeP degradation to UV-Photolysis (B), GDE  $e\text{-H}_2\text{O}_2$  (C) GDE  $e\text{-H}_2\text{O}_2\text{+UV}$  (D), GDEm  $e\text{-H}_2\text{O}_2$  (E) GDEm  $e\text{-H}_2\text{O}_2\text{+UV}$  (F)

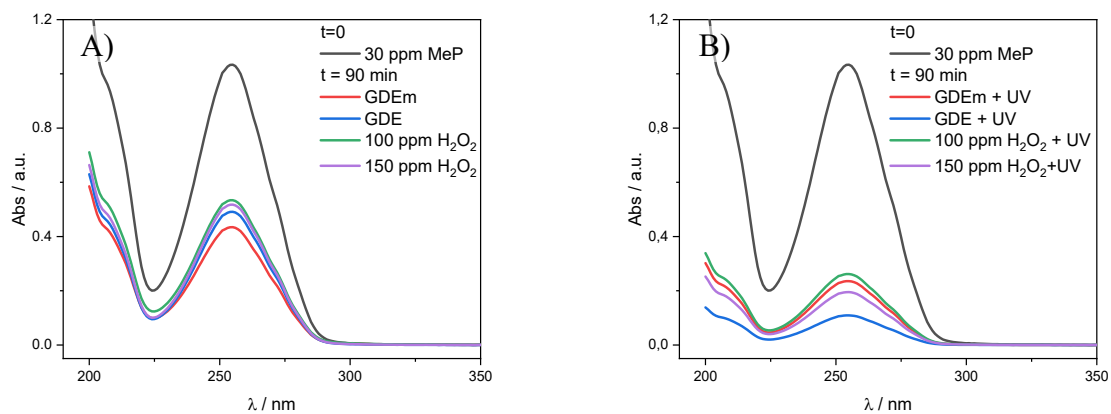

Figure S9: A) UV-Vis absorption spectra of MeP degradation to A)  $e\text{-H}_2\text{O}_2$  and process without GDE; B)  $e\text{-H}_2\text{O}_2$ +UV and process without GDE
